# Supplementary material
Source: PubMed Central journal article supplement (PMC2918291)
Supplement: NIHMS223257-supplement-1.pdf [file NIHMS223257-supplement-1.pdf]

## Novel insights into $K^+$ selectivity from high resolution structures of an open $K^+$ channel pore

Sheng Ye<sup>1</sup>, Yang Li<sup>2</sup> & Youxing Jiang<sup>3,4</sup>

<sup>1</sup>Life Sciences Institute, Zhejiang University, Hangzhou, 310058 Zhejiang, P.R. China,

<sup>2</sup>Shanghai Institute of Materia Medica, Chinese Academy of Sciences, Shanghai 201203, P.R. China.

<sup>3</sup>Department of Physiology, University of Texas Southwestern Medical Center, Dallas, Texas 75390-9040, and <sup>4</sup>Howard Hughes Medical Institute

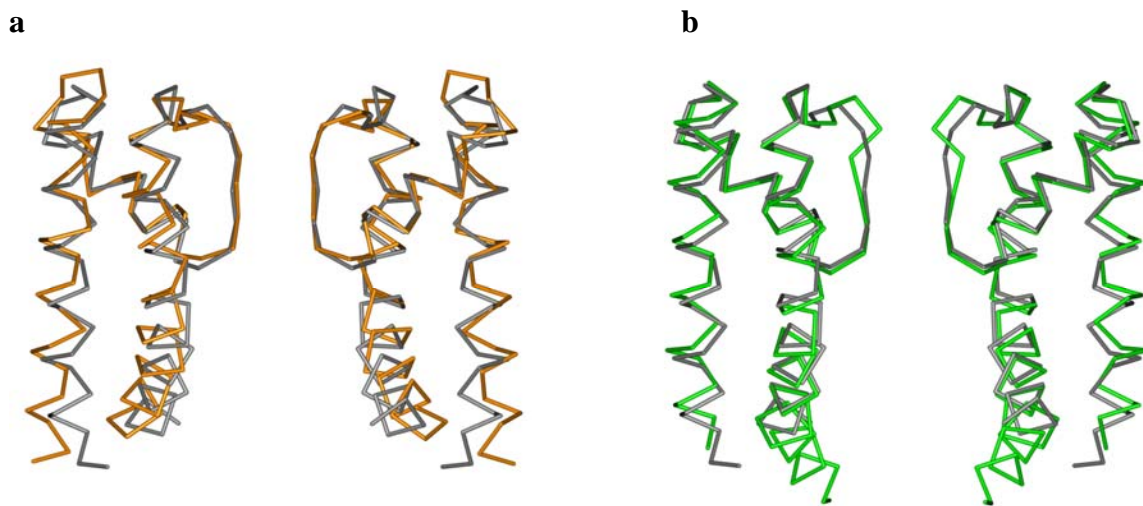

**Supplementary Figure 1.** Conservation of pore-opening mechanics in tetrameric cation channels. **a**, Superimposition of  $C\alpha$  atoms between the isolated MthK pore (grey) and the pore region of the full-length MthK structure (gold, PDB code 1LNQ). **b**, Superimposition of  $C\alpha$  atoms between the isolated MthK pore (grey) and the non-selective NaK channel (green, PDB code 3E86).

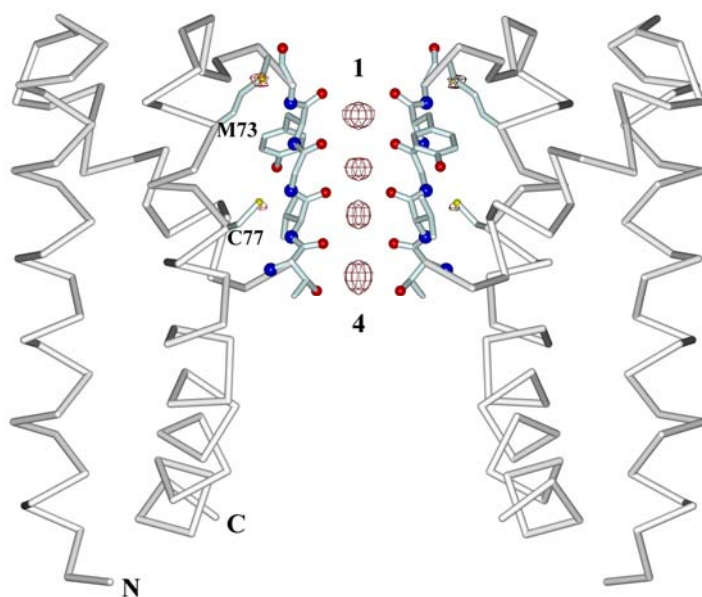

**Supplementary Figure 2.** Anomalous difference Fourier map of K<sup>+</sup> complex (in 100 mM K<sup>+</sup>). All major peaks ( $> 5\sigma$ , red mesh) are from K<sup>+</sup> ions in the selectivity filter and sulfur atoms from Met73 and Cys77.

**Supplementary Table 1**

Anomalous scattering factors (F' and F'') of all elements in MthK pore crystals

| Elements        | Wavelength (Å) | F' (e <sup>-</sup> ) | F'' (e <sup>-</sup> ) |
|-----------------|----------------|----------------------|-----------------------|
| K <sup>+</sup>  | 0.9794         | 0.2698               | 0.4634                |
| S               | 0.9794         | 0.1827               | 0.2341                |
| Na <sup>+</sup> | 0.9794         | 0.0569               | 0.0490                |
| C               | 0.9794         | 0.0042               | 0.0033                |
| N               | 0.9794         | 0.0088               | 0.0067                |
| O               | 0.9794         | 0.0163               | 0.0122                |
